# Supplementary material for: Alloying effect modulated electronic structure of Mo-doped PdIn bimetallene nanoribbons for ambient electrosynthesis of urea
Source: Royal Society of Chemistry journal article supplement (doi:10.1039/d4cc04927f), 2025-01-01
Supplement: d4cc04927f1.pdf [file d4cc04927f1.pdf]

## Electronic Supplementary Information

### Chemicals and materials

Sodium tetrachloropalladate ( $\text{Na}_2\text{PdCl}_4$ ), indium chloride ( $\text{InCl}_3$ ), L-ascorbic acid (AA), *N,N*-dimethylformamide (DMF), polyvinylpyrrolidone (PVP, MW=40000), Nafion 117 solution (5 wt%) and indium oxide ( $\text{In}_2\text{O}_3$ ) were supplied by Aladdin. Ethylenediamine (EN) was provided from Sinopharm Chemical Reagent Co. Ltd. (Shanghai, China). Molybdenum hexacarbonyl ( $\text{Mo}(\text{CO})_6$ ) was purchased from Macklin. All chemicals were used as received without any further purification.

### Synthesis of the Mo-PdIn BNRs

For a typical synthesis of Mo-PdIn BNRs, AA (80 mg),  $\text{Mo}(\text{CO})_6$  (50 mg) and PVP (600 mg, MW=40000) were added to 2 mL of EN in a glass vial to dissolve ultrasonically. Subsequently, 0.1 mL  $\text{InCl}_3$  (0.1 M DMF solution) and 0.3 mL  $\text{Na}_2\text{PdCl}_4$  (0.1 M DMF solution) were added to the above solution and sonicated to mix evenly. Then putting it into the 120 °C oil bath for 8 h. Finally, after mixture cooled to room temperature, the Mo-PdIn BNRs are collected by alternate centrifugation (10000 rpm) washing with acetone, ethanol, and deionized water. For comparison, Mo-PdIn-50 BNRs and Mo-PdIn-200 BNRs samples were synthesized by the same method except adding different amounts of  $\text{InCl}_3$  precursors (50  $\mu\text{l}$ , 200  $\mu\text{l}$ ), respectively.

### Synthesis of the Mo-Pd MNRs

As a control sample, the synthesis method is the same as the above Mo-PdIn BNRs synthesis except that  $\text{InCl}_3$  is not added.

### Synthesis of the PdIn BNRs

As a control sample, the synthesis method is the same as the above Mo-PdIn BNRs synthesis except

that the addition of  $\text{Mo}(\text{CO})_6$  is replaced by the introduction of carbon monoxide.

### **General characterization**

A ZEISS Gemini 500 scanning electron microscope (SEM) configured with energy-dispersive X-ray spectroscopy (EDX) was used to characterize the morphology and elemental distribution of the catalyst. Finer structural information of the catalyst was obtained by transmission electron microscopy (TEM) with a JEM-2100F. The crystal structure of the catalyst was obtained by a DX-2700 X-ray diffractometer (XRD). The elemental composition and electronic states of the catalysts were measured with an X-ray photoelectron spectroscopy (XPS) model ULVAC PHI Quantera. The ultraviolet–visible (UV–Vis) absorption was obtained by a TU-1900 spectrophotometer. The gas products were analyzed by a gas chromatograph (GC-2014 Shimadzu). The element components of the sample were measured via the inductively coupled plasma optical emission spectroscopy (ICP-OES, Agilent7700). The liquid products were analyzed by an Avance III HD 500 (Bruker) employed to collect nuclear magnetic resonance (NMR) spectroscopy.

### **Electrochemical measurements**

All electrochemical measurements were performed on a CHI 760E electrochemical workstation. Electrocatalytic performance of urea synthesis was measured by a H-type three-electrode cell. Ag/AgCl electrode served as reference electrodes and a carbon rod as the counter electrode. The electrocatalyst ink was prepared via adding 4 mg of electrocatalyst to a 1 mL mixture containing 980  $\mu\text{L}$  of ethanol and 20  $\mu\text{L}$  of Nafion 117 (5 wt%). The preparation of the working electrode was described as follows, the Mo-PdIn BNRs or Mo-Pd MNRs electrocatalyst ink was sprayed on a  $1 \times 1 \text{ cm}^2$  hydrophobicity carbon paper with a loading of  $0.4 \text{ mg cm}^{-2}$  and dried naturally. During electrochemical measurements, high-purity  $\text{CO}_2$  was continuously bubbled into a 0.1 M  $\text{KNO}_3$

solution at the cathode at a constant flow rate of 20 sccm. All potentials were finally normalized to RHE reference scale ( $E$  (vs. RHE) =  $E$  (vs. Ag/AgCl) + 0.197 + 0.059 × pH).

### **Product quantification**

The diacetylmonoxime method was typically applied to detect urea if the  $\text{NO}_2^-$  concentration is lower than 20 ppm.<sup>1</sup> Solution A, comprising 100 mL concentrated phosphoric acid, 300 mL concentrated sulfuric acid and 100 mg ferric chloride dissolved in 600 mL deionized water. Solution B, 0.5 g diacetylmonoxime, 10 mg aminothiourea and 100 mL deionized water. Then 2 mL of solution A and 1 mL of solution B was added into 1 mL of electrolyte solution after diluting. After heating at 110 °C for 15 min and cooling, the absorbance of the solution at 525 nm was measured by UV-Vis spectroscopy. The concentration of urea was calculated according to the calibration of the standard urea solution concentration-absorbance curve.

The possible  $\text{NO}_3^-$  reduction products ( $\text{NH}_3$ ,  $\text{NO}_2^-$ ) were quantified using the spectrophotometric method based on the calibration curves. Specifically, ammonia content was measured using the indophenol blue method<sup>2</sup>: 2.0 mL of 1 M sodium hydroxide aqueous solution containing 5% sodium citrate and 5% salicylic acid, 1.0 mL of 0.05 M sodium hypochlorite solution, and 0.2 mL of 1% mass fraction of sodium nitroxycyanide aqueous solution were added in sequence. In 2.0 mL of diluted electrolyte, mix the above solution evenly, place it in a dark environment to react for 2 h, and finally measure the absorbance at 665 nm. The amount of ammonia was computed according to the calibration of the standard ammonia concentration-absorbance curve. The concentration of  $\text{NO}_2^-$  was quantified by the Griess method.<sup>2</sup> Specifically, 0.4 g sulfonamide, 0.02 g naphthylethylenediamine hydrochloride and 1 mL phosphoric acid were dissolved in 5 mL water as a color developer, and 5 mL of diluted electrolyte was mixed with 0.1 mL of chromogenic reagent, and after 20 min of color

development, color development was performed with a UV-visible spectrophotometer, and the absorbance was recorded at 540 nm. The amount of nitrite was calculated according to the calibration of the standard nitrite concentration-absorbance curve.

The quantitative analysis of H<sub>2</sub> and CO was conducted by GC with a thermal conductivity detector and flame ionization detectors.

Product yield rate and Faradaic efficiency (FE) were calculated using the equations:

$$\text{Urea yield rate} = C_{\text{urea}} \times V / (m \times t)$$

$$\text{FE}_{\text{urea}} = 16 \times F \times C_{\text{urea}} \times V / (60.06 \times Q)$$

$$\text{FE}_{\text{NH}_3} = 8 \times F \times C_{\text{NH}_3} \times V / (17 \times Q)$$

$$\text{FE}_{\text{NO}_2^-} = 2 \times F \times C_{\text{NO}_2^-} \times V / (46 \times Q)$$

$$\text{FE}_{\text{CO}} = 2 \times F \times n_{\text{CO}} / Q$$

$$\text{FE}_{\text{H}_2} = 2 \times F \times n_{\text{H}_2} / Q$$

Where  $C_{\text{urea}}$  is urea concentration,  $V$  is catholyte volume,  $m$  is the catalyst weight (mg),  $t$  is reaction time,  $F$  is Faraday constant (96485 C mol<sup>-1</sup>),  $C_{\text{NH}_3}$  refers to the concentration of ammonia,  $C_{\text{NO}_2^-}$  refers to the concentration of nitrite,  $Q$  is the total amount of charges passing the electrode.

#### **In-situ Fourier transform infrared (FTIR):**

The Experiments were performed in a Nicolet iS50 spectrometer equipped with a liquid nitrogen-cooled MCT detector. The working electrode was prepared by spreading the configured catalyst suspension evenly over the surface of a gold-plated semi-cylindrical silicon prism. Pt electrode and Ag/AgCl electrode were used as the counter and reference electrodes. The 0.1 M KNO<sub>3</sub> solution served as the electrolyte with CO<sub>2</sub>-saturated. Each spectrum was obtained with a time resolution of 32 seconds, and the background spectrum of the electrode is obtained at the open circuit voltage

before the test. The voltage with measured potential range is  $-0.2\sim-0.6$  V vs. RHE.

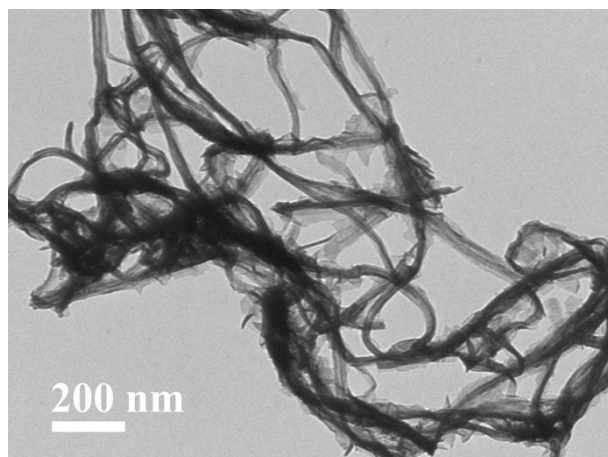

**Fig. S1** TEM image of the Mo-Pd MNRs.

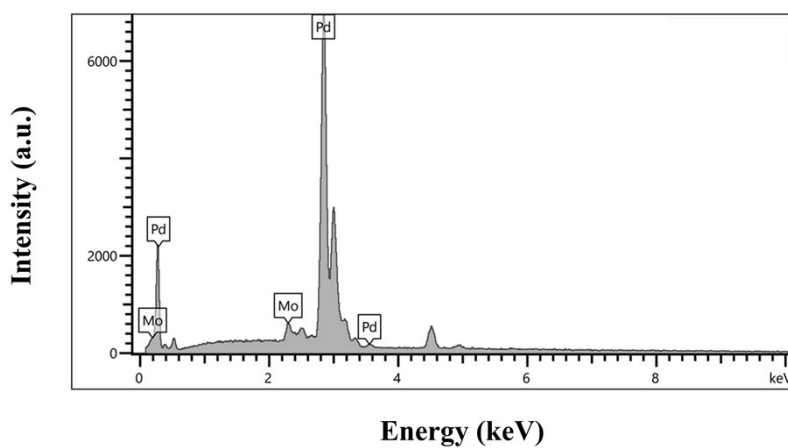

**Fig. S2** EDX spectrum of the Mo-Pd MNRs.

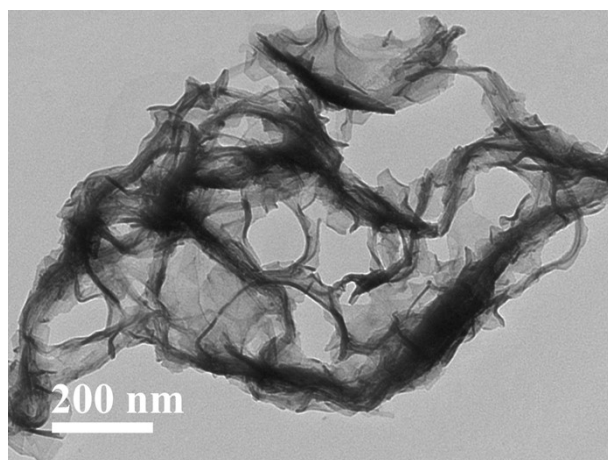

**Fig. S3** TEM image of the PdIn BNRs.

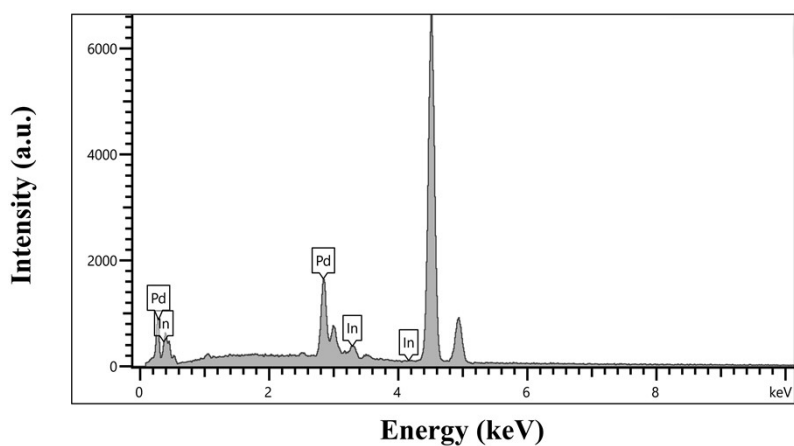

**Fig. S4** EDX spectrum of the PdIn BNRs.

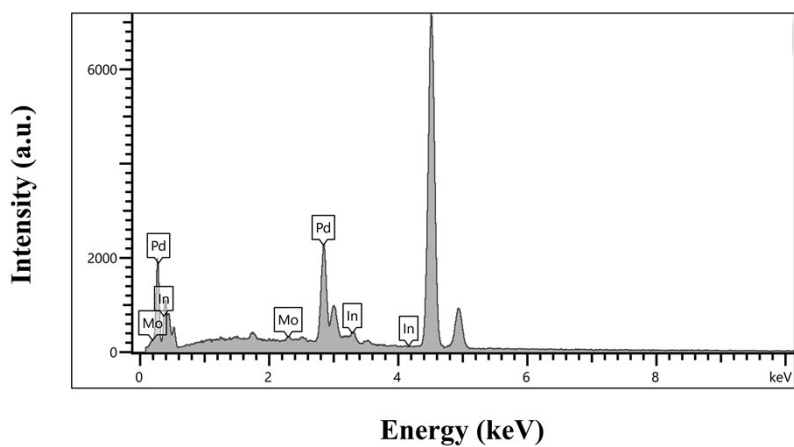

**Fig. S5** EDX spectrum of the typical Mo-PdIn BNRs.

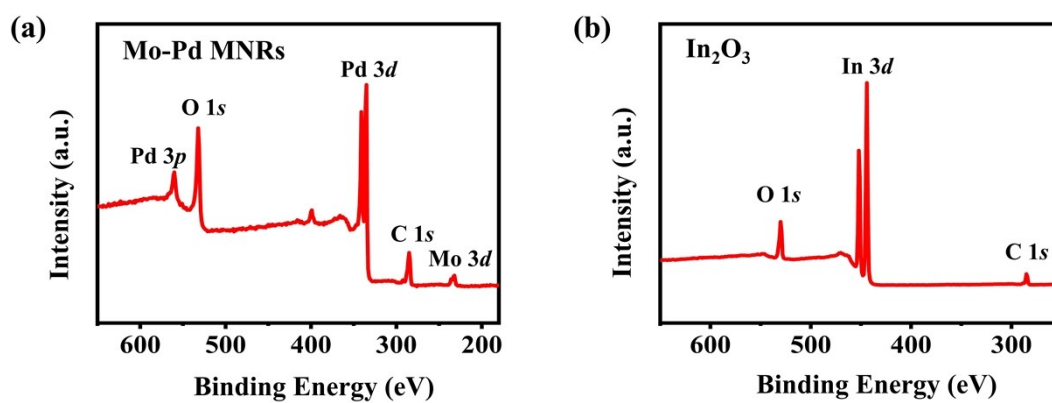

**Fig. S6** XPS survey spectra of the (a) Mo-Pd MNRs and (b) commercial In<sub>2</sub>O<sub>3</sub>.

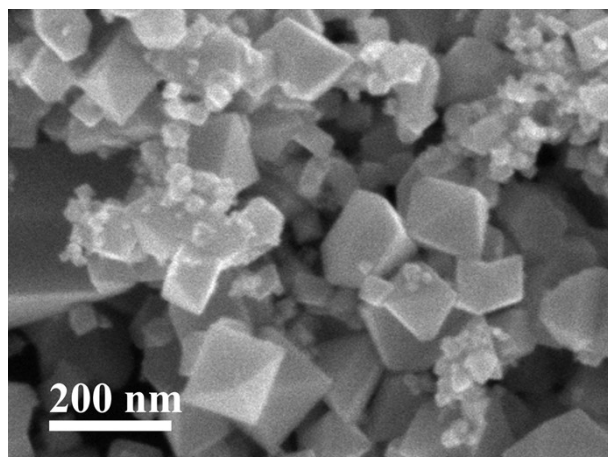

Fig. S7 SEM image of In<sub>2</sub>O<sub>3</sub>.

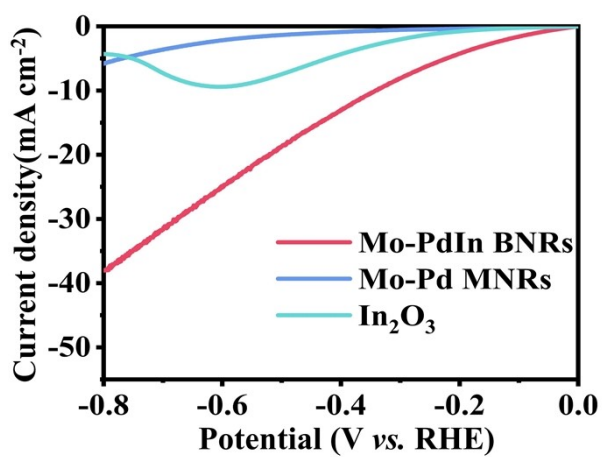

Fig. S8 LSV curves of Mo-PdIn BNRs, Mo-Pd MNRs and In<sub>2</sub>O<sub>3</sub> in 0.1 M KNO<sub>3</sub> solution with flowing CO<sub>2</sub>.

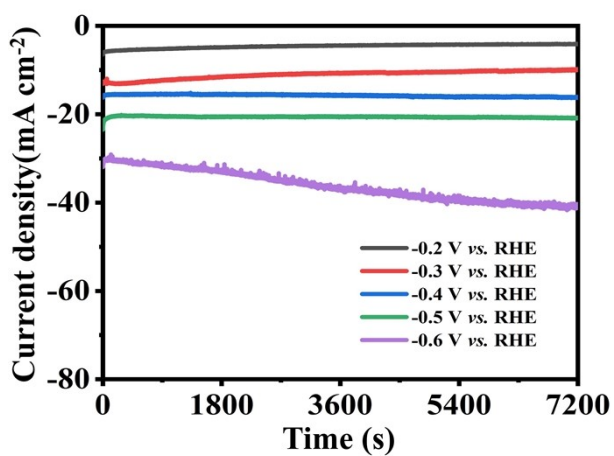

Fig. S9 Chronoamperometric curves of the Mo-PdIn BNRs for co-reduction of CO<sub>2</sub> and NO<sub>3</sub><sup>-</sup> under different potentials.

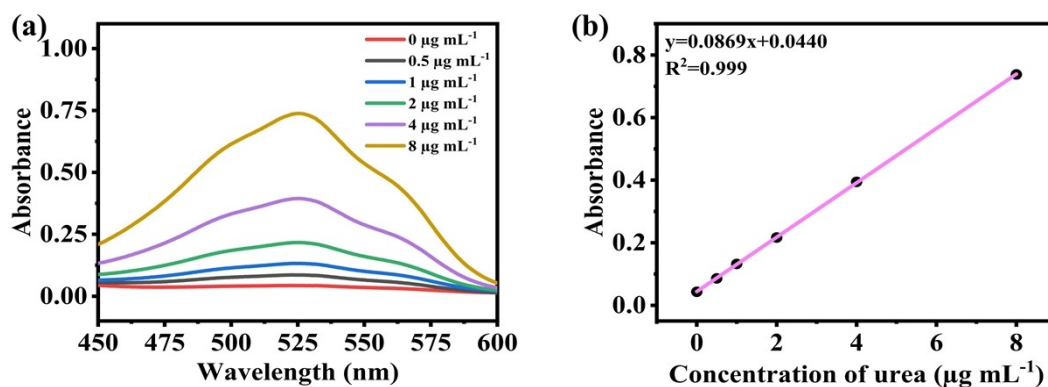

**Fig. S10** (a) UV-Vis spectra of standard urea solution with various concentrations. (b) The corresponding calibration curve.

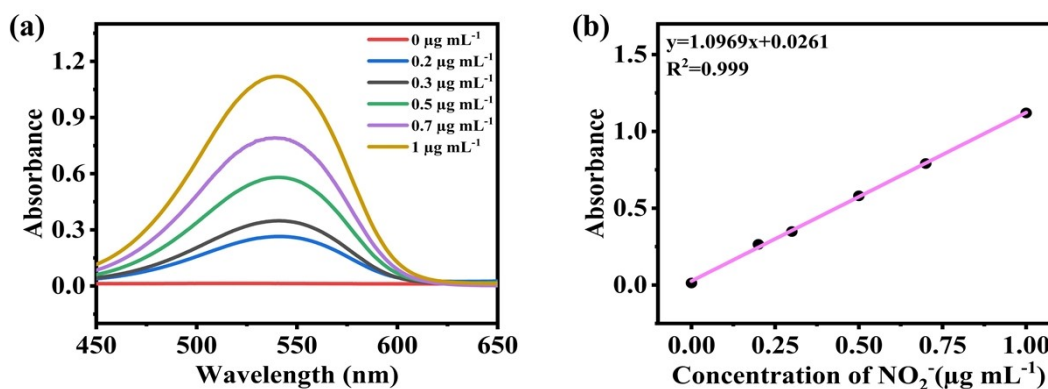

**Fig. S11** (a) UV-Vis spectra of standard  $\text{NO}_2^-$  solution with various concentrations. (b) The corresponding calibration curve.

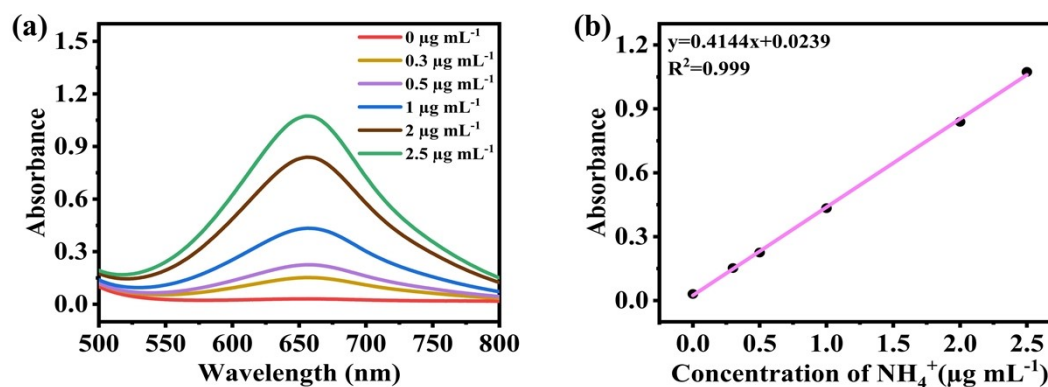

**Fig. S12** (a) UV-Vis spectra of standard  $\text{NH}_4^+$  solution with various concentrations. (b) The corresponding calibration curve.



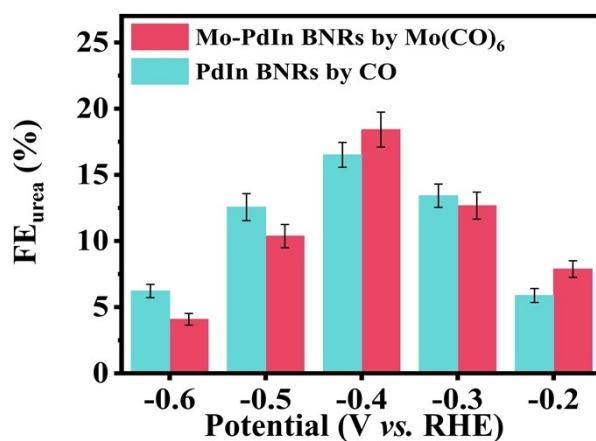

Fig. S13 The FE of urea with Mo-PdIn BNRs or PdIn BNRs at different applied potentials.

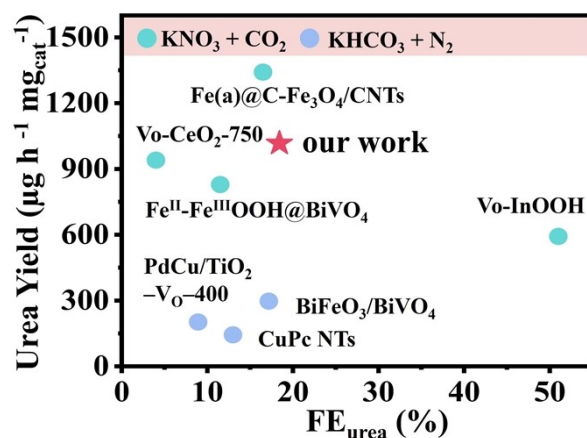

Fig. S14 Comparison of urea FE and yield rate of Mo-PdIn BNRs with some other reported catalysts.

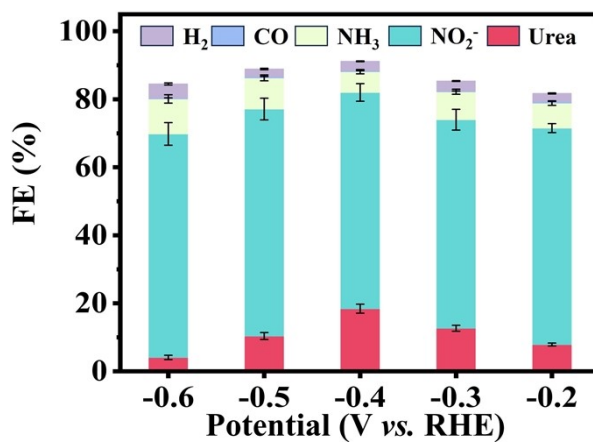

Fig. S15 FEs of main products of CO<sub>2</sub> and NO<sub>3</sub><sup>-</sup> co-reduction on the Mo-PdIn BNRs.

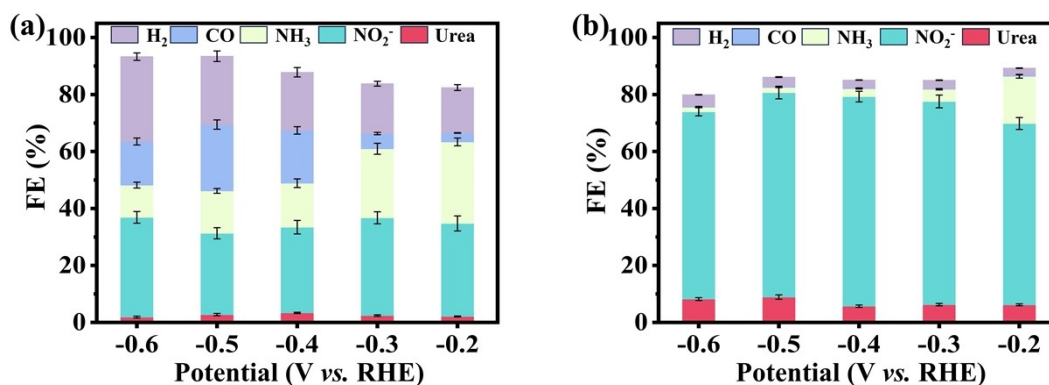

**Fig. S16** (a) FEs of main products of  $\text{CO}_2$  and  $\text{NO}_3^-$  co-reduction on the Mo-Pd MNRs. (b) FEs of main products of  $\text{CO}_2$  and  $\text{NO}_3^-$  co-reduction on the  $\text{In}_2\text{O}_3$ .

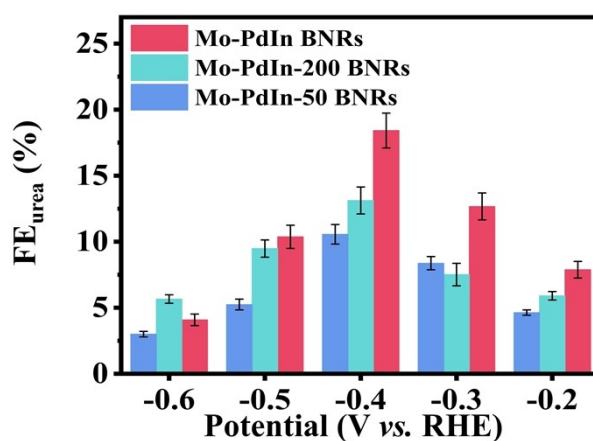

**Fig. S17** The FEs of urea with varying contents of Mo-PdIn BNRs at different applied potentials. The atomic ratios of Pd/In in the typical Mo-PdIn BNRs, Mo-PdIn-200 BNRs and Mo-PdIn-50 BNRs are determined to be 6.2/1, 2.3/1 and 7.7/1, respectively.

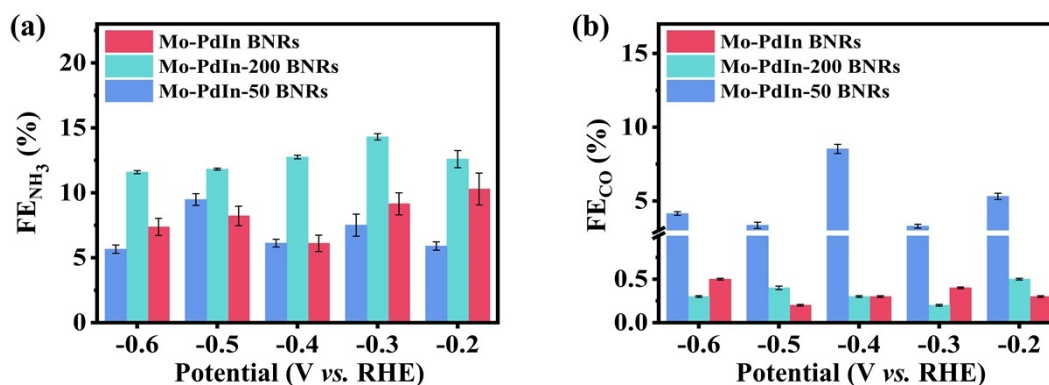

**Fig. S18** FEs of (a)  $\text{NH}_3$  and (b)  $\text{CO}$  with varying contents of Mo-PdIn BNRs at different applied potentials.

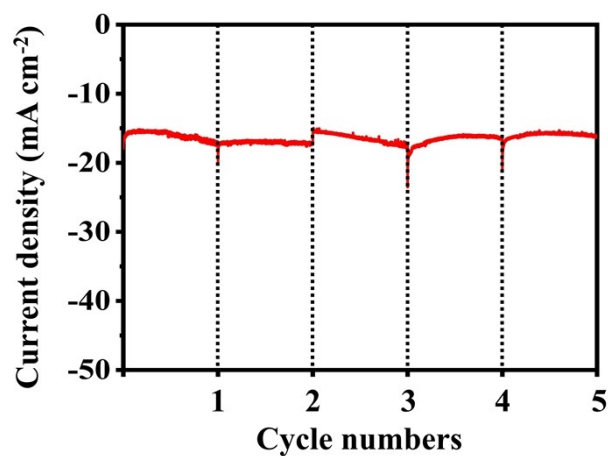

**Fig. S19** Chronoamperometric curve of the Mo-PdIn BNRs at -0.4 V vs. RHE for 5 cycles (2 h for each cycle).

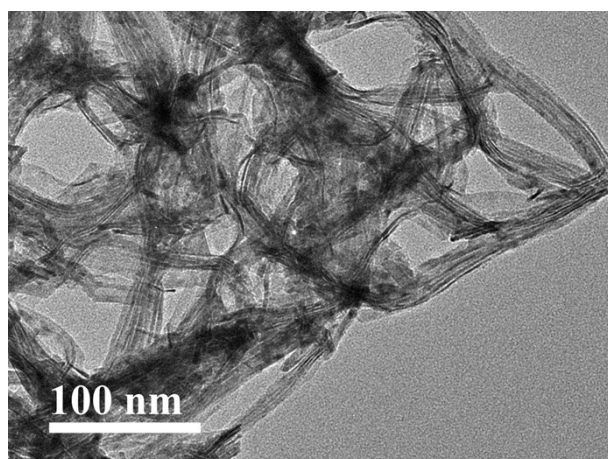

**Fig. S20** TEM image of the Mo-PdIn BNRs after cycle testing.

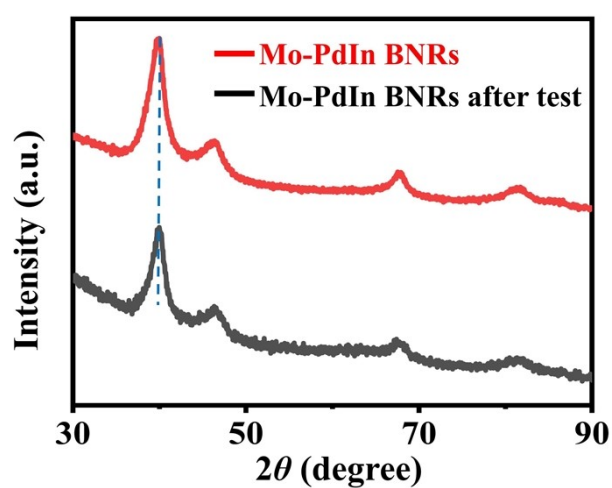

**Fig. S21** XRD patterns of Mo-PdIn BNRs before and after cycle testing.

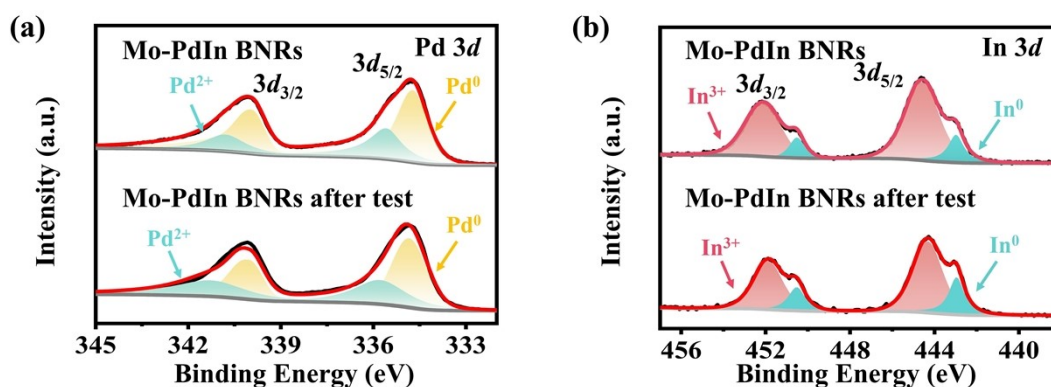

**Fig. S22** (a) Pd 3d XPS spectra and (b) In 3d XPS spectra of Mo-PdIn BNRs before and after cycle testing.

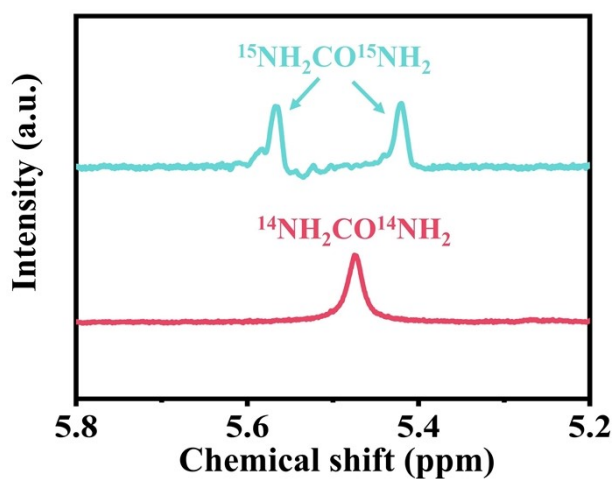

**Fig. S23** <sup>1</sup>H NMR spectra of urea produced using <sup>14</sup>NO<sub>3</sub><sup>-</sup>/CO<sub>2</sub> and <sup>15</sup>NO<sub>3</sub><sup>-</sup>/CO<sub>2</sub> as feedstocks respectively.

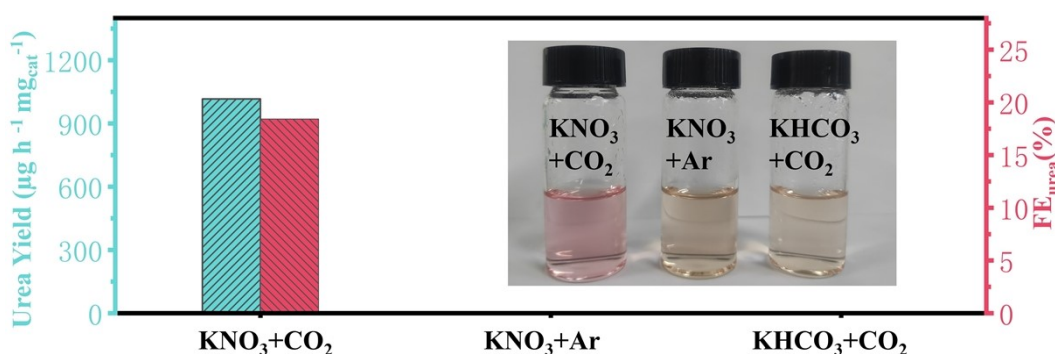

**Fig. S24** Comparison of urea yield and FE under different reaction conditions and corresponding color development results.

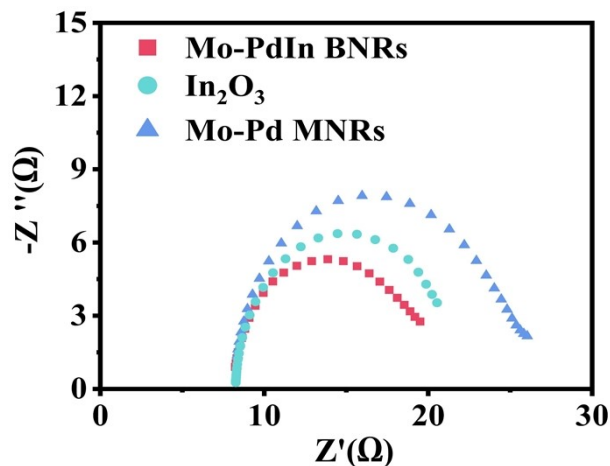

**Fig. S25** EIS spectra of Mo-PdIn BNRs,  $\text{In}_2\text{O}_3$  and Mo-Pd MNRs catalysts at  $-0.4$  V vs. RHE in a frequency ranging from 100 kHz to 0.1 Hz.

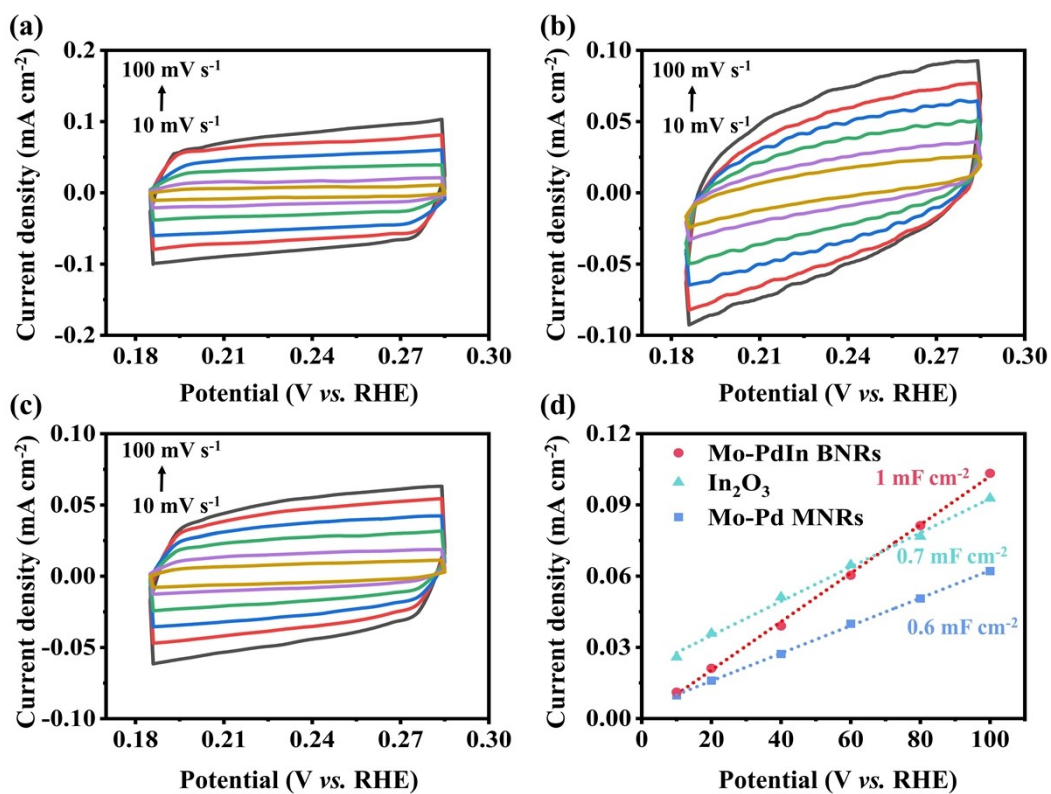

**Fig. S26** CV curves of catalysts under various scan rates from 10 to 120  $\text{mV s}^{-1}$ : (a) Mo-PdIn BNRs, (b)  $\text{In}_2\text{O}_3$  and (c) Mo-Pd MNRs. (d) The calculated  $C_{dl}$  values.

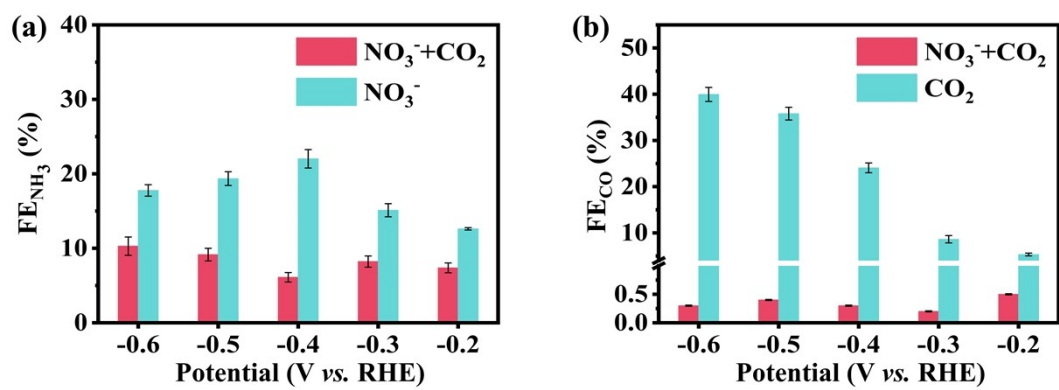

**Fig. S27** (a) NH<sub>3</sub> FEs of Mo-PdIn BNRs for NO<sub>3</sub><sup>-</sup>RR and C-N coupling reaction. (b) CO FEs of Mo-PdIn BNRs for CO<sub>2</sub>RR and C-N coupling reaction.

**Table S1** The atomic ratios of various samples determined by ICP-OES.

| <b>Samples</b> | <b>Atomic ratio</b>         |
|----------------|-----------------------------|
| Mo-PdIn BNRs   | Pd/In/Mo = 82.84/13.33/3.83 |
| PdIn BNRs      | Pd/In = 85.64/14.36         |
| Mo-Pd MNRs     | Pd/Mo = 95.40/4.60          |

**Table S2.** Comparison of electrocatalytic performance of Mo-PdIn BNRs toward urea synthesis with previously reported catalysts.

| Catalysts                                                 | Reactant                                                                  | Yeild rate<br>( $\mu\text{g h}^{-1}\text{mg}_{\text{cat}}^{-1}$ ) | FE <sub>urea</sub><br>(%) | Potential<br>(V vs. REH) | Ref.                 |
|-----------------------------------------------------------|---------------------------------------------------------------------------|-------------------------------------------------------------------|---------------------------|--------------------------|----------------------|
| <b>Mo-PdIn BNRs</b>                                       | <b>CO<sub>2</sub> +<br/>0.1 M KNO<sub>3</sub></b>                         | <b>1016.49</b>                                                    | <b>18.42</b>              | <b>-0.4 V</b>            | <b>this<br/>work</b> |
| BiFeO <sub>3</sub> /BiVO <sub>4</sub>                     | N <sub>2</sub> +<br>0.1 M KHCO <sub>3</sub>                               | 297.3                                                             | 17.18                     | -0.4 V                   | 3                    |
| CuPc NTs                                                  | N <sub>2</sub> +<br>0.1 M KHCO <sub>3</sub>                               | 143.47                                                            | 12.99                     | -0.6 V                   | 4                    |
| PdCu/TiO <sub>2</sub> -V <sub>o</sub> -400                | N <sub>2</sub> +<br>0.1 M KHCO <sub>3</sub>                               | 201.8                                                             | 8.92                      | -0.4 V                   | 5                    |
| Fe(a)@C-Fe <sub>3</sub> O <sub>4</sub> /CNTs              | CO <sub>2</sub> +<br>0.1 M KNO <sub>3</sub>                               | 1341.3                                                            | 16.50                     | -0.65 V                  | 6                    |
| Fe <sup>II</sup> -Fe <sup>III</sup> OOH@BiVO <sub>4</sub> | CO <sub>2</sub> +<br>0.1 M KNO <sub>3</sub>                               | 828.83                                                            | 11.50                     | -0.8 V                   | 7                    |
| V <sub>o</sub> -CeO <sub>2</sub> -750                     | CO <sub>2</sub> +<br>0.1 M KHCO <sub>3</sub> +<br>0.05 M KNO <sub>3</sub> | 943.6                                                             | 4.00                      | -1.6 V                   | 8                    |
| V <sub>o</sub> -InOOH                                     | CO <sub>2</sub> +<br>0.1 M KNO <sub>3</sub>                               | 592.5                                                             | 51.00                     | -0.5 V                   | 9                    |



## References

1. M. Sun, G. Wu, J. Jiang, Y. Yang, A. Du, L. Dai, X. Mao and Q. Qin, *Angew. Chem. Int. Ed.*, 2023, **62**, e202301957.
2. P. Zhan, J. Zhuang, S. Yang, X. Li, X. Chen, T. Wen, L. Lu, P. Qin, B. Han, *Angew. Chem. Int. Ed.*, 2024, **63**, 202409019.
3. M. Yuan, J. Chen, Y. Bai, Z. Liu, J. Zhang, T. Zhao, Q. Shi, S. Li, X. Wang and G. Zhang, *Chem. Sci.*, 2021, **12**, 6048-6058.
4. J. Mukherjee, S. Paul, A. Adalder, S. Kapse, R. Thapa, S. Mandal, B. Ghorai, S. Sarkar and U. K. Ghorai, *Adv. Funct. Mater.*, 2022, **32**, 2200882.
5. C. Chen, X. Zhu, X. Wen, Y. Zhou, L. Zhou, H. Li, L. Tao, Q. Li, S. Du, T. Liu, D. Yan, C. Xie, Y. Zou, Y. Wang, R. Chen, J. Huo, Y. Li, J. Cheng, H. Su, X. Zhao, W. Cheng, Q. Liu, H. Lin, J. Luo, J. Chen, M. Dong, K. Cheng, C. Li and S. Wang, *Nat. Chem.*, 2020, **12**, 717-724.
6. J. Geng, S. Ji, M. Jin, C. Zhang, M. Xu, G. Wang, C. Liang and H. Zhang, *Angew. Chem. Int. Ed.*, 2023, **62**, e202210958.
7. H. Yin, Z. Sun, Q. Zhao, L. Yang, T. Lu and Z. Zhang, *J. Energy Chem.*, 2023, **84**, 385-393.
8. X. Wei, X. Wen, Y. Liu, C. Chen, C. Xie, D. Wang, M. Qiu, N. He, P. Zhou, W. Chen, J. Cheng, H. Lin, J. Jia, X. Z. Fu and S. Wang, *J. Am. Chem. Soc.*, 2022, **144**, 11530-11535.
9. C. Lv, C. Lee, L. Zhong, H. Liu, J. Liu, L. Yang, C. Yan, W. Yu, H. H. Hng, Z. Qi, L. Song, S. Li, K. P. Loh, Q. Yan and G. Yu, *ACS Nano*, 2022, **16**, 8213-8222.
